# Supplementary material
Source: PubMed Central journal article supplement (PMC2631950)

**Supplementary Figure 1. DA clearance time ( $T_{80}$ ) and signal amplitude ( $A_{max}$ ) measurements following systemic AMPH or METH in the dorsal striatum.**

Chronoamperometry was used to measure DA clearance (DA applied locally every 5-min) in dorsal striatum of urethane-anesthetized rats. Either 1 or 5 mg/kg AMPH or METH were injected i.p. 1 min before  $t = 0$ . The values shown are the mean changes from baseline (%) from 5-60 min after drug (AMPH or METH 1 or 5 mg/kg) injection. (A) DA clearance time ( $T_{80}$ ), Two-way ANOVA revealed no significant differences in the  $T_{80}$  for drug effect (AMPH vs. METH, 1 or 5 mg/kg), (B) DA signal amplitude ( $A_{max}$ ), an effect of drug (AMPH vs. METH) exists at 5mg/kg for  $A_{max}$ ,  $n = 4/\text{group}$  ( $p < 0.01$ ).

# Supplemental Fig 1

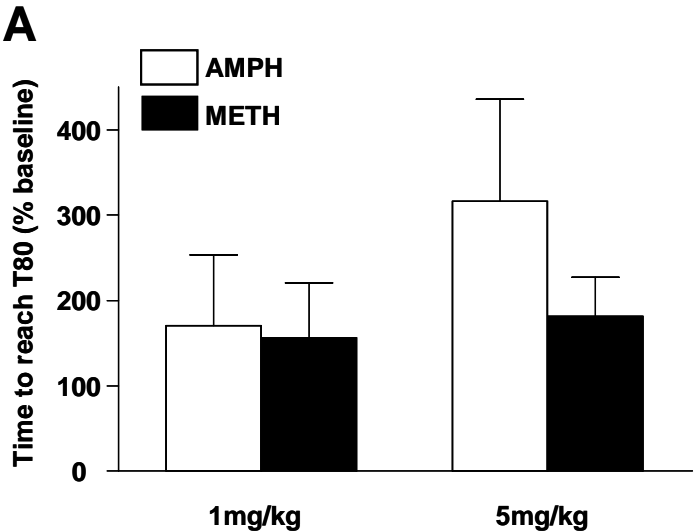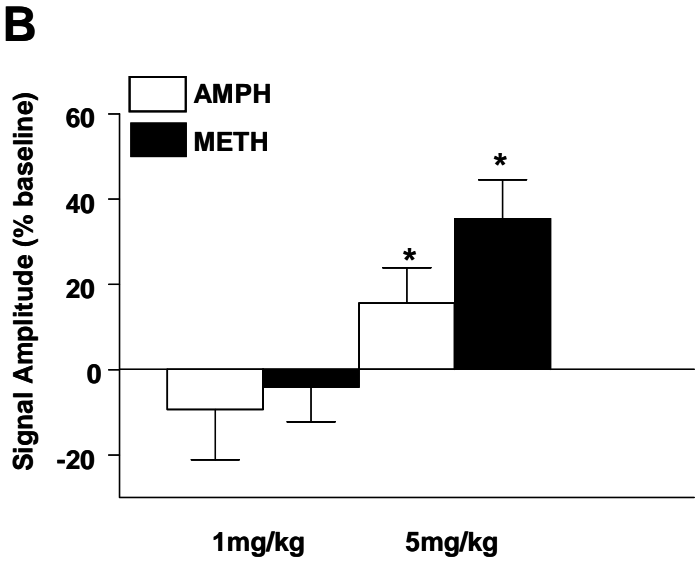

Supplement: M805298200_1.pdf [file M805298200_1.pdf]
